# Supplementary material for: Stability and structures of gaseous In2MoO4, In2WO4 and In2W2O7
Source: Royal Society of Chemistry journal article supplement (doi:10.1039/c3dt32719a), 2013-01-01
Supplement: c3dt32719a.pdf [file c3dt32719a.pdf]

## Supporting information

# Stability and structures of gaseous $\text{In}_2\text{MoO}_4$ , $\text{In}_2\text{WO}_4$ and $\text{In}_2\text{W}_2\text{O}_7$

*S. I. Lopatin,\* A.I. Panin and S. M. Shugurov*

Department of Chemistry, St. Petersburg State University, 198504 St. Petersburg,  
Russia.

**Table S1** Equilibrium data for the gas-phase reaction (2) for the  $\text{In}_2\text{O}_3 - \text{Mo}$  system

| $T$ (K) | $p_i$ (atm)                            |                                 |                                            | $-\Delta_r H^0(0)$ (kJ) |
|---------|----------------------------------------|---------------------------------|--------------------------------------------|-------------------------|
|         | $\text{In}_2\text{O}$<br>$\times 10^8$ | $\text{MoO}_3$<br>$\times 10^5$ | $\text{In}_2\text{MoO}_4$<br>$\times 10^7$ |                         |
| 1769    | 1.7                                    | 1.1                             | 90.3                                       | 485.7                   |
| 1770    | 1.5                                    | 0.51                            | 23.6                                       | 479.9                   |
| 1781    | 1.9                                    | 0.47                            | 14.2                                       | 473.0                   |
| 1772    | 1.5                                    | 0.38                            | 5.9                                        | 464.2                   |
| 1839    | 2.8                                    | 0.92                            | 15.9                                       | 473.3                   |
| 1838    | 1.8                                    | 0.83                            | 9.8                                        | 473.9                   |
| 1885    | 3.2                                    | 1.8                             | 26.4                                       | 479.8                   |
| 1889    | 2.7                                    | 1.6                             | 16.4                                       | 477.7                   |
| 1885    | 2.4                                    | 1.3                             | 16.3                                       | 481.4                   |
| 1930    | 4.9                                    | 1.4                             | 47.1                                       | 496.8                   |
| 1933    | 4.9                                    | 3.0                             | 34.8                                       | 480.4                   |
| 1932    | 4.9                                    | 2.1                             | 16.7                                       | 474.3                   |
| 1965    | 9.9                                    | 3.7                             | 19.6                                       | 464.0                   |
| 1725    | 5.8                                    | 1.1                             | 10.9                                       | 426.5                   |
| 1745    | 3.7                                    | 0.83                            | 5.6                                        | 432.7                   |
| 1743    | 2.9                                    | 1.1                             | 5.8                                        | 432.3                   |
| 1744    | 4.4                                    | 1.0                             | 5.4                                        | 426.6                   |
| 1729    | 2.7                                    | 0.61                            | 6.0                                        | 438.7                   |
| 1724    | 3.1                                    | 0.63                            | 6.2                                        | 435.9                   |
| 1764    | 5.6                                    | 1.4                             | 10.3                                       | 432.1                   |
| 1766    | 5.2                                    | 1.2                             | 10.5                                       | 436.4                   |
| 1764    | 4.9                                    | 1.2                             | 10.7                                       | 436.8                   |
| 1763    | 4.8                                    | 1.2                             | 10.5                                       | 436.5                   |
| 1763    | 3.4                                    | 1.2                             | 10.5                                       | 442.2                   |
| 1804    | 1.7                                    | 1.0                             | 12.1                                       | 466.5                   |
| 2038    | 125.0                                  | 8.6                             | 22.7                                       | 425.1                   |
| 2043    | 32.4                                   | 8.6                             | 9.9                                        | 434.8                   |
| 2037    | 14.2                                   | 2.0                             | 9.6                                        | 472.2                   |
| 2046    | 6.9                                    | 12.7                            | 4.1                                        | 439.9                   |

|      |      |       |       |       |
|------|------|-------|-------|-------|
| 1651 | 0.13 | 0.016 | 0.071 | 450.9 |
| 1711 | 0.13 | 0.024 | 0.020 | 441.9 |
| 1791 | 0.65 | 0.069 | 0.098 | 446.0 |
| 1786 | 0.54 | 0.065 | 0.086 | 446.4 |
| 1787 | 0.56 | 0.068 | 0.086 | 445.5 |
| 1804 | 0.59 | 0.093 | 0.11  | 434.2 |
| 1815 | 0.57 | 0.094 | 0.087 | 433.3 |
| 1806 | 0.55 | 0.089 | 0.087 | 432.7 |
| 1835 | 0.64 | 0.11  | 0.10  | 434.7 |
| 1843 | 0.62 | 0.17  | 0.10  | 431.8 |
| 1838 | 0.80 | 0.17  | 0.13  | 430.0 |

---

Average value 451±21

**Table S2** Equilibrium data for the gas-phase reaction (3) for the  $\text{In}_2\text{O}_3 - \text{W}$  system

| $T$ (K) | $p_i$ (atm)                            |                                |                                           | $-\Delta_r H^0(0)$ (kJ) |
|---------|----------------------------------------|--------------------------------|-------------------------------------------|-------------------------|
|         | $\text{In}_2\text{O}$<br>$\times 10^7$ | $\text{WO}_3$<br>$\times 10^7$ | $\text{In}_2\text{WO}_4$<br>$\times 10^5$ |                         |
| 1457    | 3100                                   | 0.56                           | 5.7                                       | 370.8                   |
| 1449    | 226                                    | 0.64                           | 2.4                                       | 388.6                   |
| 1465    | 200                                    | 0.24                           | 1.0                                       | 395.2                   |
| 1514    | 198                                    | 0.34                           | 1.3                                       | 407.4                   |
| 1563    | 11.9                                   | 0.52                           | 0.22                                      | 427.4                   |
| 1558    | 3.2                                    | 0.26                           | 0.11                                      | 442.5                   |
| 1664    | 1.7                                    | 1.5                            | 0.041                                     | 441.7                   |
| 1717    | 0.59                                   | 5.1                            | 0.0084                                    | 430.7                   |
| 1548    | 0.42                                   | 3.3                            | 0.050                                     | 423.6                   |
| 1544    | 0.65                                   | 3.8                            | 0.053                                     | 415.9                   |
| 1553    | 0.62                                   | 3.5                            | 0.065                                     | 422.6                   |
| 1553    | 0.99                                   | 3.3                            | 0.069                                     | 418.0                   |
| 1547    | 2.0                                    | 2.9                            | 0.24                                      | 425.0                   |
| 1550    | 1.5                                    | 2.7                            | 0.28                                      | 431.8                   |
| 1548    | 8.9                                    | 2.2                            | 0.69                                      | 423.4                   |
| 1543    | 20.4                                   | 22.3                           | 0.75                                      | 382.7                   |
| 1548    | 30.7                                   | 26.7                           | 0.89                                      | 378.4                   |
| 1449    | 10.4                                   | 2.1                            | 1.5                                       | 405.4                   |
| 1446    | 10.9                                   | 1.3                            | 1.2                                       | 407.2                   |
| 1453    | 8.7                                    | 0.75                           | 0.92                                      | 415.3                   |
| 1452    | 9.3                                    | 0.90                           | 1.1                                       | 414.4                   |
| 1447    | 7.8                                    | 0.75                           | 0.91                                      | 414.9                   |
| 1489    | 16.4                                   | 4.1                            | 1.4                                       | 401.5                   |
| 1484    | 13.8                                   | 2.8                            | 1.3                                       | 405.9                   |
| 1486    | 12.9                                   | 2.4                            | 1.2                                       | 407.8                   |
| 1480    | 11.2                                   | 1.7                            | 1.1                                       | 411.3                   |
| 1493    | 11.3                                   | 1.8                            | 0.98                                      | 412.6                   |
| 1494    | 10.4                                   | 1.5                            | 0.82                                      | 413.8                   |
| 1492    | 9.8                                    | 1.4                            | 0.82                                      | 415.3                   |
| 1496    | 8.4                                    | 1.1                            | 0.70                                      | 419.4                   |
| 1493    | 8.1                                    | 0.65                           | 0.45                                      | 420.0                   |

|      |      |      |               |        |
|------|------|------|---------------|--------|
| 1493 | 7.8  | 0.32 | 0.41          | 427.9  |
| 1352 | 4.7  | 1.3  | 1.3           | 393.0  |
| 1355 | 3.5  | 0.64 | 1.0           | 403.2  |
| 1410 | 5.4  | 1.3  | 0.25          | 388.1  |
| 1412 | 1.0  | 0.67 | 0.17          | 411.1  |
| 1410 | 1.2  | 0.67 | 0.22          | 411.6  |
| 1421 | 2.0  | 0.76 | 0.30          | 410.5  |
| 1424 | 2.8  | 0.76 | 0.55          | 414.8  |
| 1427 | 4.5  | 0.68 | 0.68          | 413.7  |
| 1427 | 4.9  | 0.34 | 0.88          | 423.8  |
| 1430 | 6.4  | 0.85 | 0.95          | 411.7  |
| 1483 | 11.6 | 4.1  | 1.6           | 406.1  |
|      |      |      | Average value | 412±15 |

---

**Table S3** Equilibrium data for the Gas-Phase Reaction (4) for the  $\text{In}_2\text{O}_3 - \text{W}$  System

| $T$ (K) | $p_i$ (atm)                            |                                |                                                    | $-\Delta_r H^0(0)$ (kJ) |
|---------|----------------------------------------|--------------------------------|----------------------------------------------------|-------------------------|
|         | $\text{In}_2\text{O}$<br>$\times 10^7$ | $\text{WO}_3$<br>$\times 10^7$ | $\text{In}_2\text{W}_2\text{O}_7$<br>$\times 10^8$ |                         |
| 1668    | 1.9                                    | 2.3                            | 7.4                                                | 872.7                   |
| 1708    | 2.1                                    | 2.6                            | 10.1                                               | 894.5                   |
| 1747    | 2.7                                    | 4.1                            | 9.1                                                | 895.8                   |
| 1749    | 2.9                                    | 3.8                            | 9.1                                                | 898.7                   |
| 1758    | 2.8                                    | 2.8                            | 7.8                                                | 910.2                   |
| 1821    | 6.9                                    | 7.7                            | 13.5                                               | 907.6                   |
| 1822    | 6.3                                    | 13.0                           | 13.5                                               | 893.4                   |
| 1832    | 5.3                                    | 5.3                            | 9.5                                                | 922.8                   |
| 1885    | 6.0                                    | 15.8                           | 11.1                                               | 916.3                   |
|         |                                        |                                | Average value                                      | 901±15                  |

**Table S4** Equilibrium data for the gas-phase reaction (5) for the  $\text{In}_2\text{O}_3 - \text{W}$  system

| $T$ (K) | $p_i$ (atm)                    |                                           |                                                    | $-\Delta_r H^0(0)$ (kJ) |
|---------|--------------------------------|-------------------------------------------|----------------------------------------------------|-------------------------|
|         | $\text{WO}_3$<br>$\times 10^7$ | $\text{In}_2\text{WO}_4$<br>$\times 10^7$ | $\text{In}_2\text{W}_2\text{O}_7$<br>$\times 10^7$ |                         |
| 1665    | 3.1                            | 2.4                                       | 2.8                                                | 458.1                   |
| 1669    | 3.5                            | 3.1                                       | 3.1                                                | 456.0                   |
| 1669    | 3.1                            | 3.5                                       | 3.8                                                | 458.6                   |
| 1666    | 4.6                            | 4.5                                       | 3.8                                                | 448.7                   |
| 1660    | 3.3                            | 2.4                                       | 4.3                                                | 461.8                   |
| 1660    | 8.7                            | 4.5                                       | 4.3                                                | 439.8                   |
| 1661    | 10.9                           | 5.2                                       | 4.4                                                | 435.4                   |
| 1665    | 11.5                           | 5.6                                       | 4.4                                                | 434.9                   |
| 1659    | 2.2                            | 2.1                                       | 1.8                                                | 457.0                   |
| 1710    | 3.4                            | 2.9                                       | 3.1                                                | 469.6                   |
| 1709    | 3.2                            | 5.0                                       | 2.6                                                | 459.6                   |
| 1708    | 3.6                            | 4.3                                       | 2.6                                                | 459.9                   |
| 1703    | 6.2                            | 2.5                                       | 1.2                                                | 447.0                   |
| 1712    | 2.8                            | 0.84                                      | 1.0                                                | 474.7                   |
| 1642    | 2.3                            | 2.1                                       | 0.97                                               | 442.9                   |
| 1638    | 2.1                            | 1.7                                       | 0.61                                               | 439.7                   |
| 1668    | 2.3                            | 1.7                                       | 0.74                                               | 449.6                   |
| 1672    | 2.3                            | 1.4                                       | 0.62                                               | 451.3                   |
| 1708    | 2.6                            | 1.5                                       | 1.0                                                | 466.0                   |
| 1713    | 1.7                            | 1.2                                       | 0.63                                               | 470.7                   |
| 1713    | 2.0                            | 0.82                                      | 0.51                                               | 469.8                   |
| 1746    | 3.2                            | 1.1                                       | 0.91                                               | 477.4                   |
| 1747    | 4.1                            | 1.3                                       | 0.91                                               | 471.1                   |
| 1749    | 3.2                            | 1.3                                       | 0.91                                               | 475.4                   |
| 1748    | 3.6                            | 1.4                                       | 0.91                                               | 472.2                   |
| 1746    | 3.8                            | 1.6                                       | 1.0                                                | 471.7                   |
| 1749    | 3.8                            | 1.3                                       | 0.91                                               | 473.0                   |
| 1751    | 2.6                            | 1.7                                       | 0.91                                               | 475.3                   |
| 1761    | 3.0                            | 1.7                                       | 1.0                                                | 478.1                   |
| 1761    | 3.0                            | 1.4                                       | 0.78                                               | 476.2                   |
| 1758    | 2.8                            | 1.3                                       | 0.78                                               | 477.5                   |

|      |      |      |               |        |
|------|------|------|---------------|--------|
| 1758 | 2.7  | 1.3  | 0.65          | 475.9  |
| 1760 | 2.8  | 0.96 | 0.65          | 480.1  |
| 1823 | 8.8  | 2.0  | 1.3           | 481.6  |
| 1821 | 7.7  | 2.0  | 1.3           | 483.2  |
| 1825 | 12.4 | 2.5  | 1.5           | 475.1  |
| 1825 | 11.2 | 1.9  | 1.5           | 481.0  |
| 1821 | 11.8 | 1.7  | 1.2           | 477.1  |
| 1822 | 13.0 | 1.7  | 1.3           | 477.5  |
| 1828 | 10.0 | 1.3  | 0.95          | 482.8  |
| 1832 | 11.3 | 1.5  | 0.95          | 479.5  |
| 1831 | 11.2 | 1.1  | 0.81          | 481.2  |
| 1832 | 5.3  | 1.4  | 0.95          | 492.2  |
| 1878 | 16.4 | 1.4  | 1.1           | 490.2  |
| 1885 | 15.8 | 1.5  | 1.1           | 491.3  |
| 1885 | 12.2 | 1.9  | 1.1           | 492.0  |
|      |      |      | Average value | 468±15 |

---



**Table S5** Equilibrium geometry parameters and vibrational frequencies of diindium monoxide ground state (gas phase,  $D_{\infty h}$ ,  $\Sigma_g^+$ )

| Bond lengths (Å),<br>valence angles (deg),<br>frequencies ( $\text{cm}^{-1}$ ) | DFT B3LYP,<br>(Def2-QZVP<br>basis set)<br>Present work | MP2(Full)<br>(Def2-QZVP<br>basis set)<br>Present work | DFT B2LYP<br>(LANL2DZ<br>Basis set) <sup>S1</sup> | Expt <sup>S2</sup> | NIST<br>Chemistry<br>WebBook <sup>S3</sup> |
|--------------------------------------------------------------------------------|--------------------------------------------------------|-------------------------------------------------------|---------------------------------------------------|--------------------|--------------------------------------------|
| R(In-O)                                                                        | 2.021                                                  | 1.987                                                 | 1.930                                             | 2.017              | -                                          |
| <(In-O-In)                                                                     | 180                                                    | 180                                                   | 180                                               | 180                | 180                                        |
| InO s-stretch ( $\Sigma_g^+$ )                                                 | 199                                                    | 211                                                   | 203                                               | 200                | 222                                        |
| Bend ( $\Pi_u$ )                                                               | 47                                                     | 65                                                    | 112                                               | -                  | 52                                         |
| InO a-stretch ( $\Sigma_u^+$ )                                                 | 718                                                    | 771                                                   | 765                                               | -                  | 735 (in Ar)                                |

**Table S6** Equilibrium geometry parameters and vibrational frequencies of molybdenum trioxide ground state (gas phase,  $C_{3v}$ ,  $^1A_1$ )

| Bond lengths (Å),<br>valence angles(deg),<br>frequencies ( $\text{cm}^{-1}$ ) | DFT B3LYP,<br>(Def2-QZVP<br>basis set)<br>Present work | MP2(Full)<br>(Def2-QZVP<br>basis set)<br>Present work | LCGTO-<br>KS-MCP-<br>DFT <sup>S4</sup> | NIST<br>Chemistry<br>WebBook <sup>S3</sup> |
|-------------------------------------------------------------------------------|--------------------------------------------------------|-------------------------------------------------------|----------------------------------------|--------------------------------------------|
| R(Mo-O)                                                                       | 1.703                                                  | 1.742                                                 | 1.74                                   | -                                          |
| <(O-Mo-O)                                                                     | 110.6                                                  | 106.4                                                 | 110.7                                  | -                                          |
| $\omega_1(A_1)$                                                               | 248                                                    | 275                                                   | -                                      | -                                          |
| $\omega_2(E)$                                                                 | 338                                                    | 326                                                   | -                                      | -                                          |
| $\omega_3(E)$<br>(MoO stretch)                                                | 963                                                    | 895                                                   | -                                      | 923 (in Ne)                                |
| $\omega_4(A_1)$<br>(MoO stretch)                                              | 1006                                                   | 858                                                   | -                                      | 976 (in Ne)                                |

**Table S7** Equilibrium geometry parameters and vibrational frequencies of tungsten trioxide ground state (gas phase,  $C_{3v}$ ,  $^1A_1$ )

| Bond lengths (Å),<br>valence angles (deg),<br>frequencies ( $\text{cm}^{-1}$ ) | DFT B3LYP,<br>(Def2-QZVP<br>basis set)<br>Present work | MP2(Full)<br>(Def2-QZVP<br>basis set)<br>Present work | CCSD(T)<br>(aug-cc-<br>pVTZ basis<br>set) <sup>S5</sup> | NIST<br>Chemistry<br>WebBook <sup>S3</sup> |
|--------------------------------------------------------------------------------|--------------------------------------------------------|-------------------------------------------------------|---------------------------------------------------------|--------------------------------------------|
| R(W-O)                                                                         | 1.725                                                  | 1.751                                                 | 1.737                                                   | -                                          |
| $\angle(\text{O-W-O})$                                                         | 107.6                                                  | 104.6                                                 | 108.3                                                   | -                                          |
| $\omega_1(A_1)$                                                                | 281                                                    | 288                                                   | -                                                       | -                                          |
| $\omega_2(E)$                                                                  | 343                                                    | 332                                                   | -                                                       | -                                          |
| $\omega_3(E)$<br>(WO stretch)                                                  | 939                                                    | 886                                                   | -                                                       | 924 (in Ne)                                |
| $\omega_4(A_1)$<br>(WO stretch)                                                | 1022                                                   | 907                                                   | -                                                       | -                                          |

**Table S8.** Equilibrium geometry parameters and vibrational frequencies of two isomers of  $\text{In}_2\text{WO}_4$ .

| Geometric parameters<br>(Å, deg)   | Structure I<br>( $D_{2d}$ ) | Structure II<br>( $C_s$ ) |
|------------------------------------|-----------------------------|---------------------------|
| $r(\text{In-O}_1)$                 | 2.383                       | 2.250                     |
| $r(\text{In-O}_2)$                 | 2.383                       | 2.606                     |
| $r(\text{W-O}_1)$                  | 1.796                       | 1.822                     |
| $r(\text{W-O}_2)$                  | 1.796                       | 1.820                     |
| $r(\text{W-O}_3)$                  | -                           | 1.730                     |
| $\angle(\text{O}_1\text{-In-O}_2)$ | 70.3                        | 69.7                      |
| $\angle(\text{In-O}_1\text{-W})$   | 95.1                        | 101.1                     |
| $\angle(\text{O}_1\text{-W-O}_2)$  | 99.5                        | 100.0                     |
| $\angle(\text{O}_1\text{-W-O}_3)$  | -                           | 113.1                     |
| $\angle(\text{O}_2\text{-W-O}_3)$  | -                           | 113.2                     |
|                                    | 48 (E)                      | 34 ( $A'' \oplus A'$ )    |
|                                    | 133 ( $A_1$ )               | 76 ( $A'$ )               |
|                                    | 149 (E)                     | 105 ( $A''$ )             |
|                                    | 183 ( $B_2$ )               | 169 ( $A'$ )              |

|                                 |                            |           |
|---------------------------------|----------------------------|-----------|
| Frequencies (cm <sup>-1</sup> ) | 282 (B <sub>1</sub> )      | 188 (A'') |
|                                 | 292 (E)                    | 280 (A')  |
|                                 | 392 (B <sub>2</sub> )      | 299 (A')  |
|                                 | 396 (A <sub>1</sub> )      | 304 (A'') |
|                                 | <b>809 (E)</b>             | 390 (A')  |
|                                 | <b>835 (B<sub>2</sub>)</b> | 391 (A'') |
|                                 | 909 (A <sub>1</sub> )      | 758 (A')  |
|                                 |                            | 777 (A'') |
|                                 |                            | 846 (A')  |
|                                 |                            | 979 (A')  |

---

**Table S9.** Equilibrium geometry parameters and vibrational frequencies of two isomers of  $\text{In}_2\text{MoO}_4$ .

| Geometric parameters<br>(Å, deg)   | Structure I<br>( $D_{2d}$ ) | Structure II<br>( $C_s$ ) |
|------------------------------------|-----------------------------|---------------------------|
| $r(\text{In-O}_1)$                 | 2.371                       | 2.266                     |
| $r(\text{In-O}_2)$                 | 2.371                       | 2.524                     |
| $r(\text{Mo-O}_1)$                 | 1.776                       | 1.799                     |
| $r(\text{Mo-O}_2)$                 | 1.776                       | 1.820                     |
| $r(\text{Mo-O}_3)$                 | -                           | 1.702                     |
| $\angle(\text{O}_1\text{-In-O}_2)$ | 70.0                        | 70.3                      |
| $\angle(\text{In-O}_1\text{-Mo})$  | 95.1                        | 99.5                      |
| $\angle(\text{O}_1\text{-Mo-O}_2)$ | 99.8                        | 100.0                     |
| $\angle(\text{O}_1\text{-Mo-O}_3)$ | -                           | 113.0                     |
| $\angle(\text{O}_2\text{-Mo-O}_3)$ | -                           | 113.9                     |
|                                    | 56 (E)                      | 43 (A')                   |
|                                    | 132 (A <sub>1</sub> )       | 92 (A'')                  |
|                                    | 153 (E)                     | 97 (A')                   |
|                                    | 207 (B <sub>2</sub> )       | 121 (A'')                 |
|                                    | 279 (B <sub>1</sub> )       | 188 (A')                  |
| Frequencies ( $\text{cm}^{-1}$ )   | 309 (E)                     | 190 (A'')                 |
|                                    | 399 (A <sub>1</sub> )       | 282 (A')                  |
|                                    | 414 (B <sub>2</sub> )       | 312 (A')                  |
|                                    | <b>817 (E)</b>              | 321 (A'')                 |
|                                    | <b>854 (B<sub>2</sub>)</b>  | 389 (A')                  |
|                                    | 886 (A <sub>1</sub> )       | 398 (A'')                 |
|                                    |                             | 747 (A')                  |
|                                    |                             | 800 (A'')                 |
|                                    |                             | 838 (A')                  |
|                                    |                             | 986 (A')                  |

**Table S10.** Equilibrium geometry parameters, and vibrational frequencies of  $\text{In}_2\text{X}_2\text{O}_7(\text{I})$  (X=W, Mo).

| Geometric parameters<br>(Å, deg)         | $\text{In}_2\text{W}_2\text{O}_7(\text{I})$<br>( $\text{C}_{2v}$ ) | $\text{In}_2\text{Mo}_2\text{O}_7(\text{I})$<br>( $\text{C}_{2v}$ ) |
|------------------------------------------|--------------------------------------------------------------------|---------------------------------------------------------------------|
| $r(\text{In-O})$                         | 2.350                                                              | 2.345                                                               |
| $r(\text{X-O})$                          | 1.783                                                              | 1.763                                                               |
| $r(\text{X-O}')$                         | 1.719                                                              | 1.691                                                               |
| $r(\text{X-O}''')$                       | 1.917                                                              | 1.904                                                               |
| $\angle(\text{O-In-O})$                  | 86.0                                                               | 85.8                                                                |
| $\angle(\text{In-O-X})$                  | 138.7                                                              | 138.7                                                               |
| $\angle(\text{O}'-\text{X}-\text{O}''')$ | 112.7                                                              | 112.4                                                               |
| $\angle(\text{X-O}''-\text{X})$          | 119.6                                                              | 119.7                                                               |
| $\angle(\text{O-X-O})$                   | 109.8                                                              | 110.3                                                               |
|                                          | 33 ( $\text{A}_1$ )                                                | 34 ( $\text{A}_1$ )                                                 |
|                                          | 38 ( $\text{A}_2$ )                                                | 42 ( $\text{A}_2$ )                                                 |
|                                          | 75 ( $\text{B}_1$ )                                                | 72 ( $\text{B}_1$ )                                                 |
|                                          | 92 ( $\text{B}_2$ )                                                | 104 ( $\text{A}_1 \oplus \text{A}_2$ )                              |
|                                          | 97 ( $\text{A}_1$ )                                                | 106 ( $\text{B}_2$ )                                                |
| Frequencies ( $\text{cm}^{-1}$ )         | 99 ( $\text{A}_2$ )                                                | 109 ( $\text{B}_1$ )                                                |
|                                          | 107 ( $\text{B}_1$ )                                               | 164 ( $\text{A}_1$ )                                                |
|                                          | 150 ( $\text{A}_1$ )                                               | 166 ( $\text{B}_1$ )                                                |
|                                          | 165 ( $\text{B}_1$ )                                               | 191 ( $\text{A}_1$ )                                                |
|                                          | 174 ( $\text{A}_1$ )                                               | 198 ( $\text{B}_2$ )                                                |
|                                          | 190 ( $\text{B}_2$ )                                               | 205 ( $\text{A}_2$ )                                                |
|                                          | 198 ( $\text{A}_2$ )                                               | 305 ( $\text{B}_2$ )                                                |
|                                          | 292 ( $\text{B}_2$ )                                               | 306 ( $\text{A}_1$ )                                                |
|                                          | 301 ( $\text{A}_1$ )                                               | 312 ( $\text{B}_1$ )                                                |
|                                          | 304 ( $\text{B}_1$ )                                               | 316 ( $\text{A}_2$ )                                                |
|                                          | 309 ( $\text{B}_2$ )                                               | 317 ( $\text{B}_2$ )                                                |
|                                          | 310 ( $\text{A}_2$ )                                               | 344 ( $\text{B}_1$ )                                                |
|                                          | 335 ( $\text{A}_1$ )                                               | 348 ( $\text{A}_1$ )                                                |
|                                          | 340 ( $\text{B}_1$ )                                               | 575 ( $\text{A}_1$ )                                                |
|                                          | 560 ( $\text{A}_1$ )                                               | 683 ( $\text{B}_2$ )                                                |
|                                          | 700 ( $\text{B}_2$ )                                               | 801 ( $\text{A}_2$ )                                                |

|                        |                        |
|------------------------|------------------------|
| 793 (A <sub>2</sub> )  | 872 (B <sub>1</sub> )  |
| 857 (B <sub>1</sub> )  | 891 (B <sub>2</sub> )  |
| 895 (B <sub>2</sub> )  | 904 (A <sub>1</sub> )  |
| 902 (A <sub>1</sub> )  | 1002 (B <sub>2</sub> ) |
| 999 (B <sub>2</sub> )  | 1011 (A <sub>1</sub> ) |
| 1005 (A <sub>1</sub> ) |                        |

---

## References

- S1 S. Mukhopadhyay, S. Gowtham, R. Pandey, and A. Costales, *Journal of Molecular Structure:THEOCHEM*, 2010, **948**, 31.
- S2 N. M. Lakin, G. van der Hoek, I.R. Beattie, and J. M. Brown, *J.Chem.Phys.*, 1997, **107**(11), 4439.
- S3 P.J. Linstrom and W.G. Mallard, Eds., *NIST Chemistry WebBook, NIST Standard Reference Database Number 69*, National Institute of Standards and Technology, Gaithersburg MD, 20899, <http://webbook.nist.gov>.
- S4 J. A. Oliveira, W. B. De Almeida, and H .A. Duarte, *Chem. Phys. Lett.*, 2003, **372**, 650.
- S5 H.-J. Zhai, B. Kiran, L.-F. Cui, X. Li, D. A. Dixon, and L.-S. Wang, *J.Am.Chem.Soc.*, 2004, **126**, 16134.
